# Supplementary material for: Kinetic analysis to describe Co-operative redox enhancement effects exhibited by bimetallic Au–Pd systems in aerobic oxidation
Source: Royal Society of Chemistry journal article supplement (doi:10.1039/d2cy01474b), 2022-11-10
Supplement: d2cy01474b1.pdf [file d2cy01474b1.pdf]

## Supplementary Information for:

### Kinetic Analysis to Describe Co-operative Redox Enhancement Effects Exhibited by Bimetallic Au-Pd Systems in Aerobic Oxidation

Isaac T. Daniel,<sup>1</sup> Liang Zhao,<sup>1</sup> Donald Bethell,<sup>1</sup> Mark Douthwaite,<sup>1\*</sup> Samuel Pattison,<sup>1</sup> Richard J. Lewis,<sup>1</sup> Ouardia Akdim,<sup>1</sup> David J. Morgan,<sup>1</sup> Steven McIntosh<sup>2</sup> and Graham J. Hutchings<sup>1\*</sup>

<sup>1</sup>Max Planck-Cardiff Centre on the Fundamentals of Heterogeneous Catalysis FUNCAT, Cardiff Catalysis Institute, School of Chemistry, Cardiff University, Main Building, Park Place, Cardiff, CF10 3AT (UK)

<sup>2</sup>Department of Chemical and Biomolecular Engineering, Lehigh University, Bethlehem, PA, USA

\*Correspondence to Mark Douthwaite (douthwaitejm@cardiff.ac.uk) and Graham J. Hutchings (hutch@cardiff.ac.uk).

| Item ID          | Caption                                                                                                                                                                                                                                                                                                                                                                   | Page Number |
|------------------|---------------------------------------------------------------------------------------------------------------------------------------------------------------------------------------------------------------------------------------------------------------------------------------------------------------------------------------------------------------------------|-------------|
| <b>Table S1</b>  | ICP-AES analysis for Au/C and Pd/C catalysts that had a target metal loading of 1 wt.%. Synthesis by a sol-immobilisation procedure. Catalysts were initially digested via microwave prior to analysis.                                                                                                                                                                   | <b>2</b>    |
| <b>Figure S1</b> | The effect on activity ( <i>eq. 15</i> ) of the addition of blank carbon to carbon supported Au, Pd or Au & Pd catalytic systems.                                                                                                                                                                                                                                         | <b>2</b>    |
| <b>Figure S2</b> | From left, XPS data for the Au4 <i>f</i> region and Pd3 <i>d</i> region for fresh 1 wt.% Au/C and 1 wt.% Pd/C, respectively                                                                                                                                                                                                                                               | <b>3</b>    |
| <b>Figure S3</b> | The consistent correlation between HMF conversion and activity for monometallic 1 wt.% Au/C and 1 wt.% Pd/C, respectively. Trends shown in the main text for activity can also be shown with HMF conversion.                                                                                                                                                              | <b>3</b>    |
| <b>Figure S4</b> | The sum of monometallic HMF conversions compared to physical mixture conversions for 1 wt.% Au/C and 1 wt.% Pd/C at various molar ratios. The total metal content is constant throughout the physical mixture system. The sum of monometallic conversions is calculated from the monometallic conversion of 1 wt.% Au/C and 1 wt.% Pd/C at each specific catalyst amount. | <b>4</b>    |

**Table S1.** ICP-AES analysis for Au/C and Pd/C catalysts that had a target metal loading of 1 wt.%. Synthesis by a sol-immobilisation procedure. Catalysts were initially digested via microwave prior to analysis.

| Catalyst ID | Weight percent (%) |
|-------------|--------------------|
| Pd/C        | 1.041              |
| Au/C        | 1.013              |

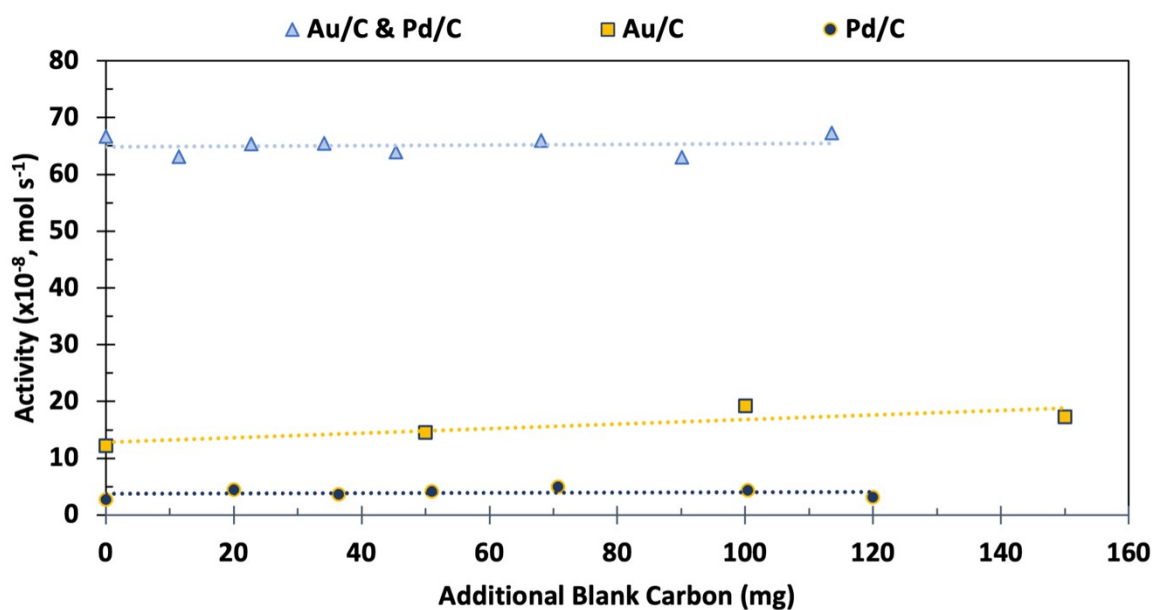

**Figure S1.** The effect on activity (eq. 15) of the addition of blank carbon to carbon supported Au, Pd or Au & Pd catalytic systems. Reaction conditions: H<sub>2</sub>O (16 mL), HMF (0.1 M), NaHCO<sub>3</sub> (0.4 M), 3 bar O<sub>2</sub>, 80 °C, 30 minutes, HMF mol : metal mol = 200 : 1 in the bimetallic system and 400 : 1 in the monometallic systems. Catalyst masses are constant throughout: 1.75 wt.% Au/C (72.1 mg), 0.25 wt.% Pd/C (68 mg). Note that these catalysts differ from those presented in the main body, hence activities are not directly comparable.

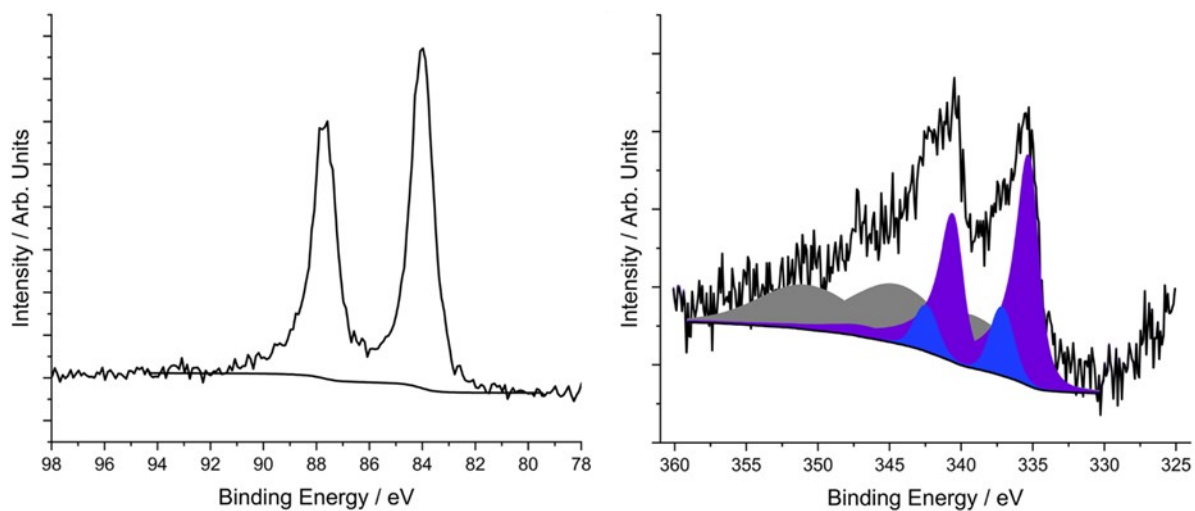

**Figure S2.** From left, XPS data for the Au $4f$  region and Pd $3d$  region for fresh 1 wt.% Au/C and 1 wt.% Pd/C, respectively. Key for Pd spectrum: Pd $^0$  components (purple); Pd $^{2+}$  components (blue); carbon loss structure (grey).

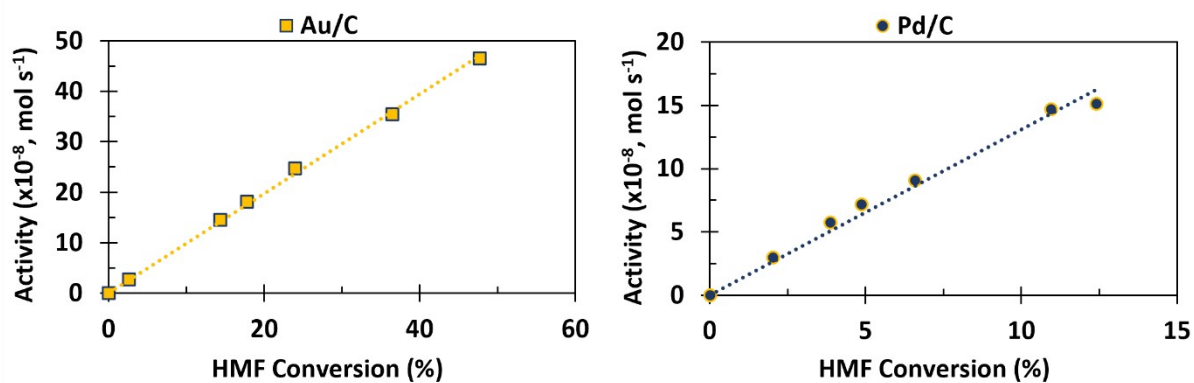

**Figure S3.** The consistent correlation between HMF conversion and activity for monometallic 1 wt.% Au/C and 1 wt.% Pd/C, respectively. Trends shown in the main text for activity can also be shown with HMF conversion. Reaction conditions: H $_2$ O (16 mL), HMF (0.1 M), NaHCO $_3$  (0.4 M), 3 bar O $_2$ , 80 °C, 30 minutes.

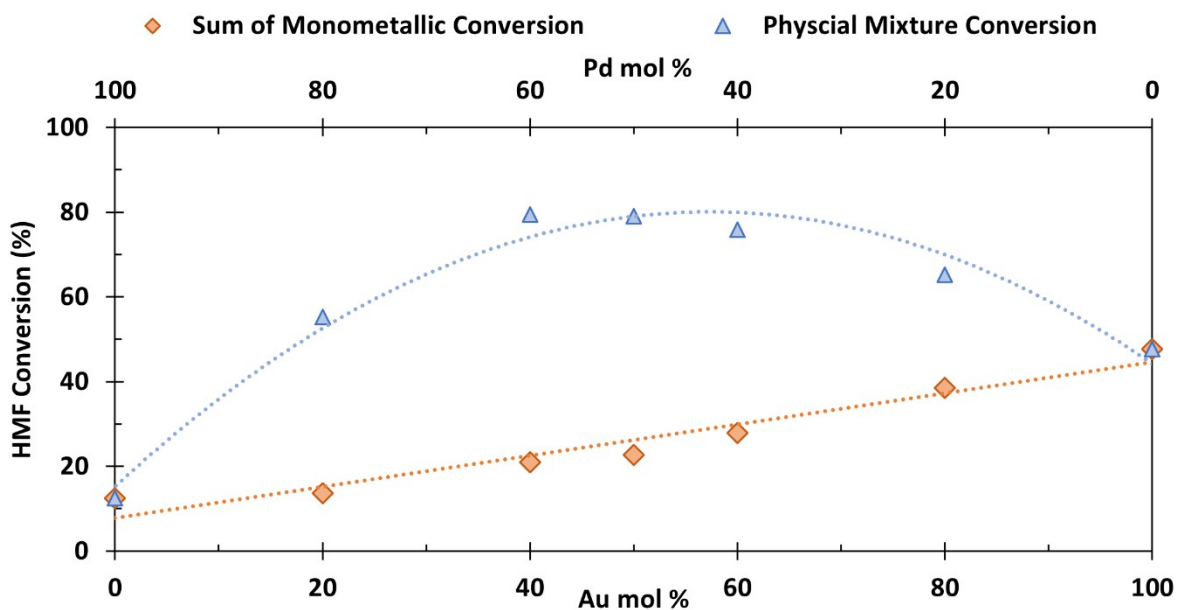

**Figure S4.** The sum of monometallic HMF conversions compared to physical mixture conversions for 1 wt.% Au/C and 1 wt.% Pd/C at various molar ratios. The total metal content is constant throughout the physical mixture system. The sum of monometallic conversions is calculated from the monometallic conversion of 1 wt.% Au/C and 1 wt.% Pd/C at each specific catalyst amount. Error bars represent +/- standard deviation for N = 2. Reaction conditions: H<sub>2</sub>O (16 mL), HMF (0.1 M), NaHCO<sub>3</sub> (0.4 M), 3 bar O<sub>2</sub>, 80 °C, 30 minutes, HMF mol : metal mol = 200 : 1 for 100 mol%.
